# Supplementary material
Source: publisher site journal article supplement (https://www.dovepress.com/article/382876)
Supplement: Supplementary file 1 [file get_supplementary_file.php]

Supplemental Table 1. baseline characteristics between excluded and included group in patients treated with IV tPA

|  | level | Overall  (n=595) | Excluded  (n=493) | Included  (n=102) | P value |
| --- | --- | --- | --- | --- | --- |
| Age (mean (SD)) |  | 63.01 (12.34) | 62.81 (12.20) | 64.01 (13.02) | 0.37 |
| Male, n (%) |  | 421 (70.76) | 354 (71.81) | 67 (65.69) | 0.264 |
| DNT time (median [IQR]) |  | 45.00 [34.00, 61.00] | 45.00 [33.00, 60.00] | 47.50 [35.00, 64.00] | 0.2 |
| Time from symptom onset to IV-tPA, min (median [IQR]) |  | 167.00 [125.00, 219.00] | 165.00 [125.00, 215.00] | 174.50 [136.50, 228.25] | 0.119 |
| Bridging mechanical  thrombectomy, n (%) |  | 48 (8.07) | 14 (2.84) | 34 (33.33) | <0.001 |
| Pre-mRS score (%) | 0 | 406 (78.38) | 325 (78.12) | 81 (79.41) | 0.356 |
|  | 1 | 57 (11.00) | 49 (11.78) | 8 (7.84) |  |
|  | 2 | 27 (5.21) | 21 (5.05) | 6 (5.88) |  |
|  | 3 | 17 (3.28) | 13 (3.12) | 4 (3.92) |  |
|  | 4 | 10 (1.93) | 8 (1.92) | 2 (1.96) |  |
|  | 5 | 1 (0.19) | 0 (0.00) | 1 (0.98) |  |
| Admission NIHSS score (median [IQR]) |  | 5.00 [3.00, 11.00] | 5.00 [3.00, 10.00] | 9.00 [4.00, 12.75] | <0.001 |
| ENI, n (%) |  | 217 (36.47) | 179 (36.31) | 38 (37.25) | 0.946 |
| Hypertension, n (%) |  | 288 (48.40) | 221 (44.83) | 67 (65.69) | <0.001 |
| Atrial fibrillation, n (%) |  | 54 (9.08) | 35 (7.10) | 19 (18.63) | <0.001 |
| Diabetes mellitus, n (%) |  | 125 (21.01) | 95 (19.27) | 30 (29.41) | 0.022 |
| Hyperlipidemia, n (%) |  | 59 (9.92) | 45 (9.13) | 14 (13.73) | 0.218 |
| Prior stroke, n (%) |  | 108 (18.15) | 81 (16.43) | 27 (26.47) | 0.017 |
| Coronary artery disease, n (%) |  | 73 (12.27) | 55 (11.16) | 18 (17.65) | 0.098 |
| Prior antiplatelet therapy, n (%) |  | 75 (12.61) | 55 (11.16) | 20 (19.61) | 0.019 |
| Prior statin therapy, n (%) |  | 63 (10.59) | 48 (9.74) | 15 (14.71) | 0.191 |
| Smoking, n (%) |  | 279 (46.89) | 220 (44.62) | 59 (57.84) | 0.015 |
| Drinking, n (%) |  | 229 (38.49) | 185 (37.53) | 44 (43.14) | 0.343 |
| Admission SBP level, mmHg (median [IQR]) |  | 150.00 [136.00, 165.00] | 151.00 [137.50, 166.00] | 144.00 [130.00, 162.00] | 0.004 |
| Admission DBP level, mmHg (median [IQR]) |  | 88.00 [79.00, 96.00] | 89.00 [80.00, 97.50] | 82.50 [75.00, 93.00] | 0.005 |
| TOAST (%) | CE | 78 (13.11) | 52 (10.55) | 26 (25.49) | <0.001 |
|  | LAA | 399 (67.06) | 332 (67.34) | 67 (65.69) |  |
|  | OTHER | 12 (2.02) | 8 (1.62) | 4 (3.92) |  |
|  | SAA | 19 (3.19) | 17 (3.45) | 2 (1.96) |  |
|  | UNKNOWN | 87 (14.62) | 84 (17.04) | 3 (2.94) |  |
| Admission serum glucose level, mmol/L (median [IQR]) |  | 6.70 [5.70, 8.50] | 6.61 [5.80, 8.47] | 6.80 [5.55, 8.50] | 0.993 |
| HbA1c level, % (median [IQR]) |  | 6.00 [5.70, 6.90] | 6.00 [5.70, 6.90] | 6.10 [5.80, 6.60] | 0.489 |
| LDL level, mmol/L (mean (SD)) |  | 2.59 (0.87) | 2.62 (0.88) | 2.50 (0.86) | 0.272 |
| Cholesterol level, mmol/L (mean (SD)) |  | 4.19 (0.98) | 4.22 (0.99) | 4.11 (0.94) | 0.397 |
| CT hypointensity sign, n (%) |  | 99 (16.64) | 77 (15.62) | 22 (21.57) | 0.186 |
| MCA hyperintensity sign, n (%) |  | 31 (5.21) | 22 (4.46) | 9 (8.82) | 0.119 |
| Fazekas scale, (median [IQR]) |  | 1.00 [1.00, 2.00] | 1.00 [1.00, 2.00] | 1.00 [1.00, 2.00] | 0.181 |
| Large vessel occlusion, n (%) | yes | 126 (21.18) | 94 (19.07) | 32 (31.37) | 0.078 |
| sICH-NINDS, n (%) | yes | 38 (6.39) | 29 (5.88) | 9 (8.82) | 0.269 |
| mRS 0-1 at discharge, n (%) | lost | 77 (12.94) | 77 (15.62) | 0 (0.00) | <0.001 |
|  | no | 294 (49.41) | 219 (44.42) | 75 (73.53) |  |
|  | yes | 224 (37.65) | 197 (39.96) | 27 (26.47) |  |

DNT, door-to-needle; IV, intravenous thrombolysis; tPA, tissue plasminogen activator; mRS, modified Rankin Scale; NIHSS, national institutes of health stroke scale; TOAST, Trial of Org 10172 in Acute Stroke Treatment; LAA, large atherosclerosis artery; CE, cardiac embolism; SAA, small artery occlusion; SBP, systolic blood pressure; DBP, diastolic blood pressure; LDL, low density lipoprotein; MCA, middle cerebral artery; sICH, symptomatic intracerebral hemorrhage; NINDS, National Institute of Neurological Disorders and Stroke trial.
